# Supplementary material for: Systems analysis reveals complex biological processes during virus infection fate decisions
Source: PubMed Central journal article supplement — Genome Res. 2019 Jun;29(6):907–19. doi: 10.1101/gr.241372.118 (PMC6581057; doi:10.1101/gr.241372.118), 2019-06

**Supplemental Fig. S2. Module eigengene expression patterns.** Module eigengene kinetics grouped based on hierarchical clustering (see Fig. 1E) obtained from acute (A) and chronic (C) infections.

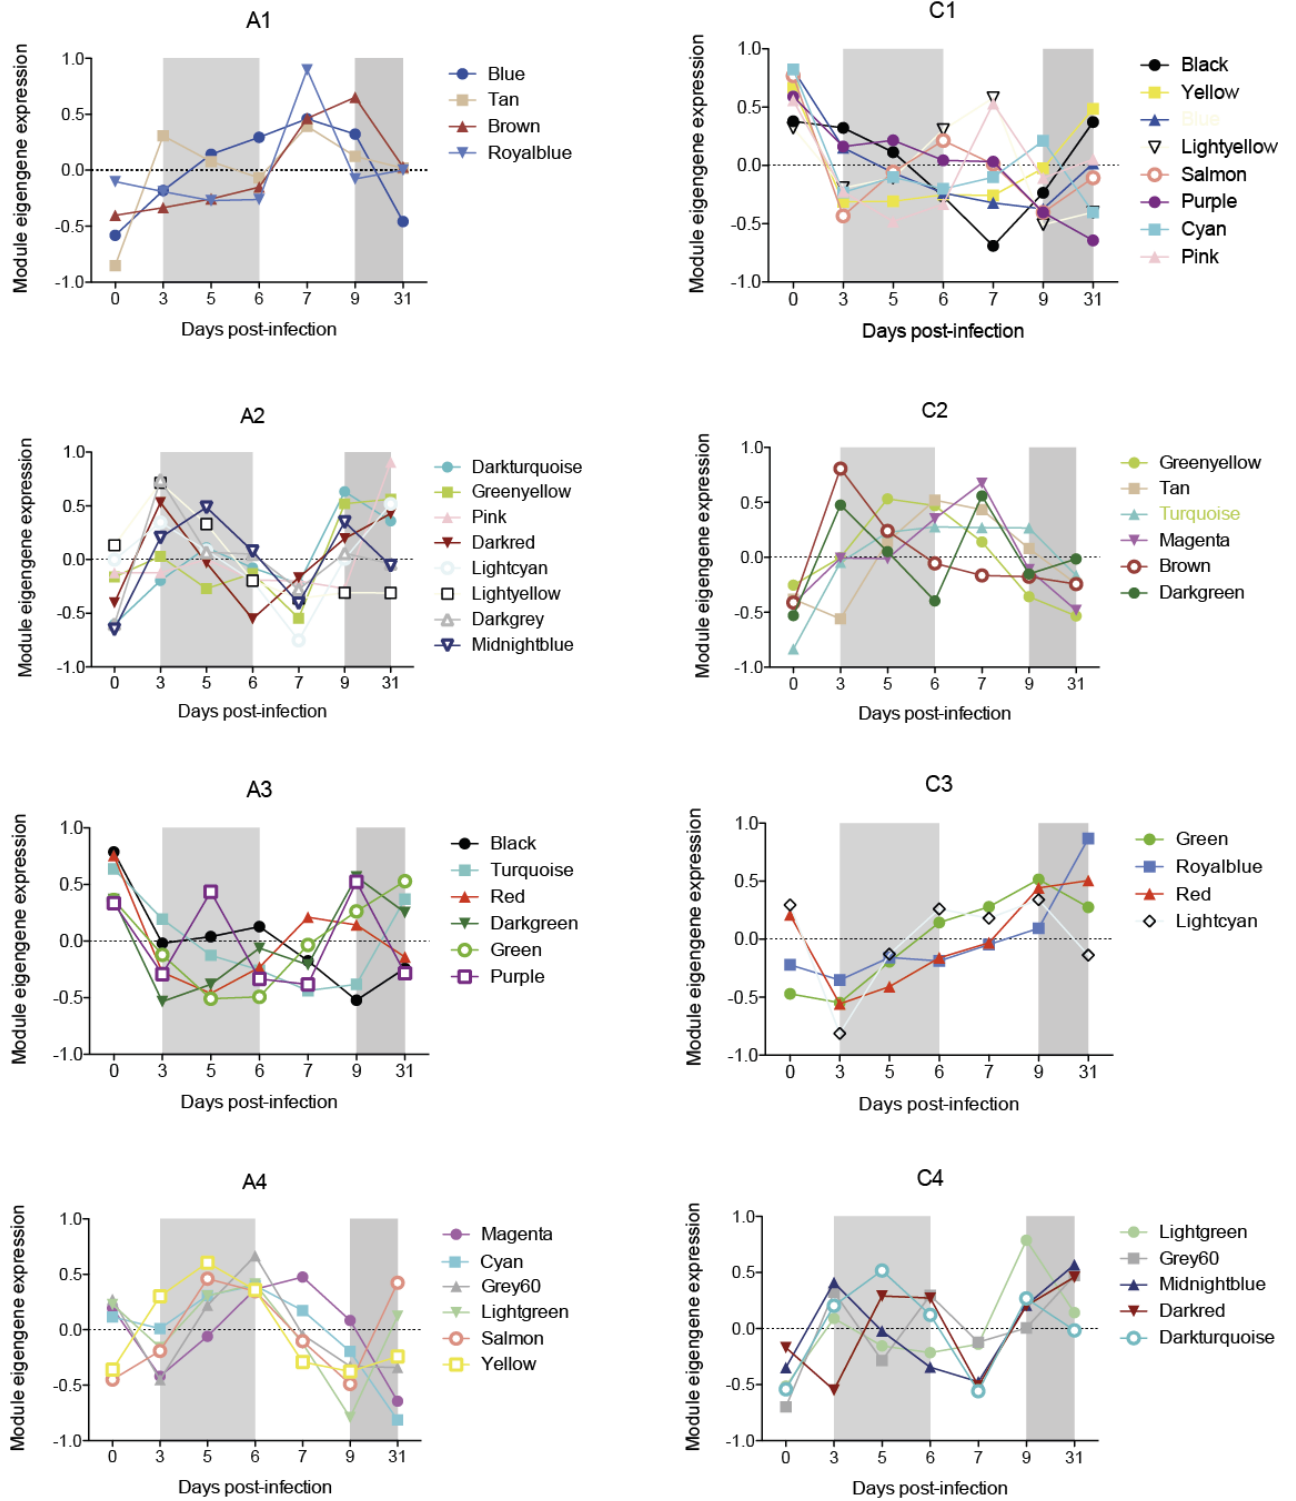

Supplement: supp_gr.241372.118_Supplemental_Fig_S2.pdf [file supp_gr.241372.118_Supplemental_Fig_S2.pdf]
