# Supplementary material for: Systems analysis reveals complex biological processes during virus infection fate decisions
Source: PubMed Central journal article supplement — Genome Res. 2019 Jun;29(6):907–19. doi: 10.1101/gr.241372.118 (PMC6581057; doi:10.1101/gr.241372.118), 2019-06

**Supplemental Fig. S7. Validation of RNAseq-derived gene expression by qPCR of monocytes/macrophages-related genes.** Quantitative PCR of *Il6*, *Il1b*, *Nos2* and *Arg2* was performed at the indicated days postinfection from spleens of acute and chronic infected mice. Relative gene expression levels were normalized by *Gapdh*. Data are shown as mean  $\pm$  SEM from 5 to 6 mice.

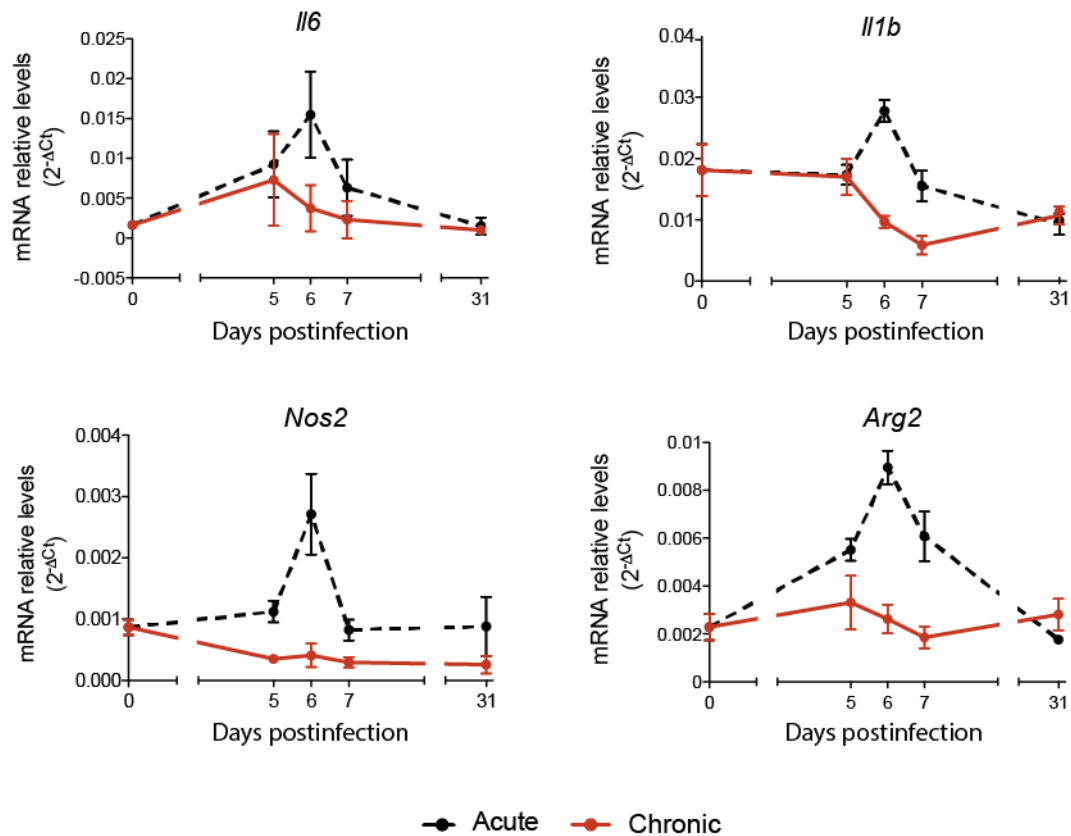

Supplement: supp_gr.241372.118_Supplemental_Fig_S7.pdf [file supp_gr.241372.118_Supplemental_Fig_S7.pdf]
