# Supplementary material for: Systems analysis reveals complex biological processes during virus infection fate decisions
Source: PubMed Central journal article supplement — Genome Res. 2019 Jun;29(6):907–19. doi: 10.1101/gr.241372.118 (PMC6581057; doi:10.1101/gr.241372.118), 2019-06

**Supplemental Fig. S8. Analysis of *Xcl1* expression and quantification of XCR1<sup>+</sup> DCs.** (A) Quantitative PCR of *Xcl1* was performed at the indicated days postinfection from spleens of acute and chronic infected mice. Relative gene expression level were normalized to *Gapdh*. For each group and time point, the mean  $\pm$  SEM is shown. \*\*\*  $p \leq 0.001$  (two-way ANOVA). (B) Percentage of XCL1-producing DbGP33-41<sup>+</sup> CD8<sup>+</sup> T cells is plotted against the percentage of DbGP33-41<sup>+</sup> CD8<sup>+</sup> T cells and IFNG-producing CD8<sup>+</sup> T cells. (C) Percentage of XCR1<sup>+</sup> dendritic cells (from CD11c<sup>+</sup> B220<sup>-</sup> cells) in spleen over the course of the infection in acute or chronic infected mice determined by flow cytometry. (D) Spleen lymphocytes were harvested at day 15 postinfection from chronic infected mice non-treated (DT-) or treated (DT+) with Diphtheria Toxin and percentages of XCR1<sup>+</sup> dendritic cells were assessed. Data are representative of three independent experiments. For each group the mean  $\pm$  SEM of n= 11 is shown. \*\*\*  $p \leq 0.001$  (Unpaired two-tailed *t*-test).

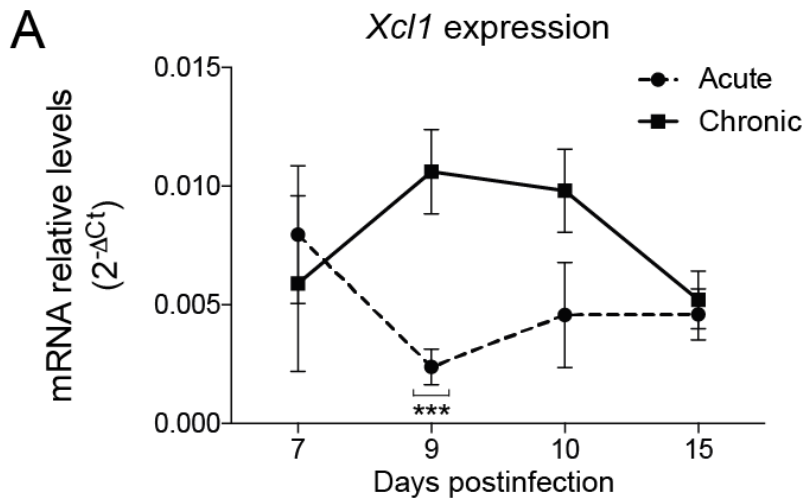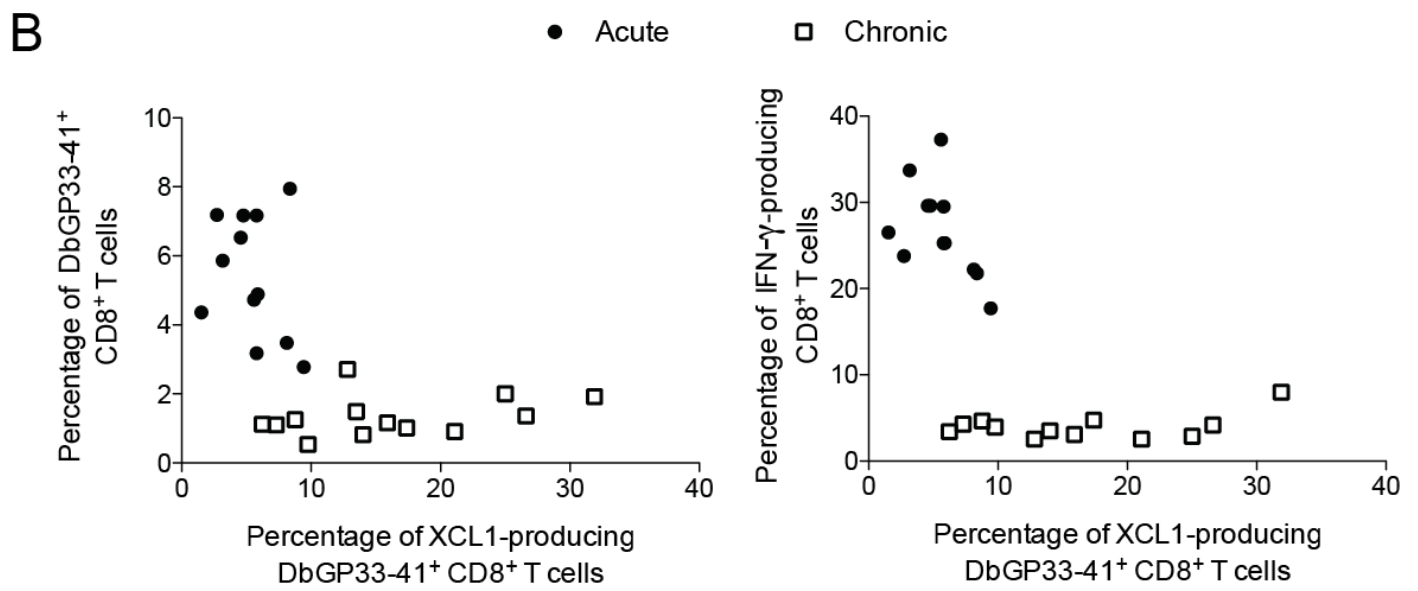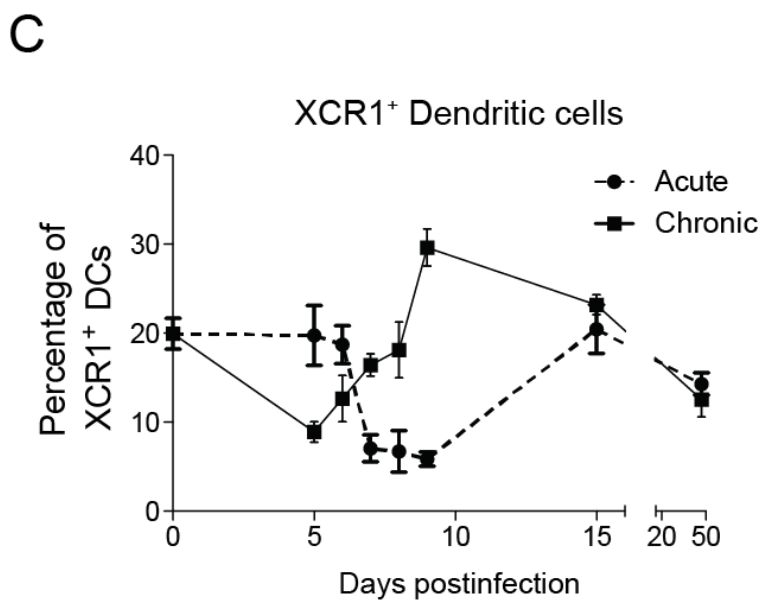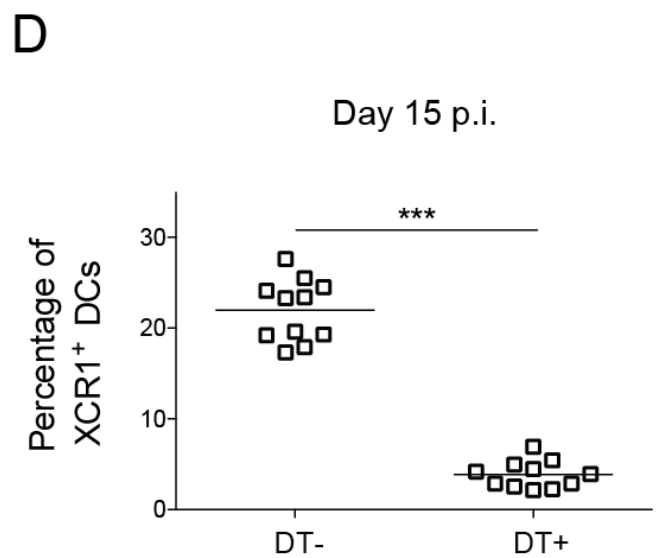

Supplement: supp_gr.241372.118_Supplemental_Fig_S8.pdf [file supp_gr.241372.118_Supplemental_Fig_S8.pdf]
