# Supplementary material for: Systems analysis reveals complex biological processes during virus infection fate decisions
Source: HighWire-hosted journal article supplement (doi:10.1101/gr.241372.118), 2019-05-28

**Supplemental Fig. S5. Acute and chronic module gene overlap and expression kinetics of highly preserved modules.** (A) Heatmap showing module gene overlap between acute and chronic infections. Each row and column is labeled by the corresponding module color, and the total number of genes in the module. Numbers within the table represents the number of genes in common between the corresponding acute and chronic modules. The significance of gene overlap was calculated by Fisher's exact test, and considered significant if  $p\text{value} < 0.05$ . Pvalues are color coded according to the color bar on the right. (B, C) Eigengene expression profiles of highly preserved modules between acute (black) and chronic (red) infections containing genes upregulated (B) or downregulated (C) after infection are shown. The number of overlapping hub genes between the corresponding chronic and acute modules are indicated in brackets.

A

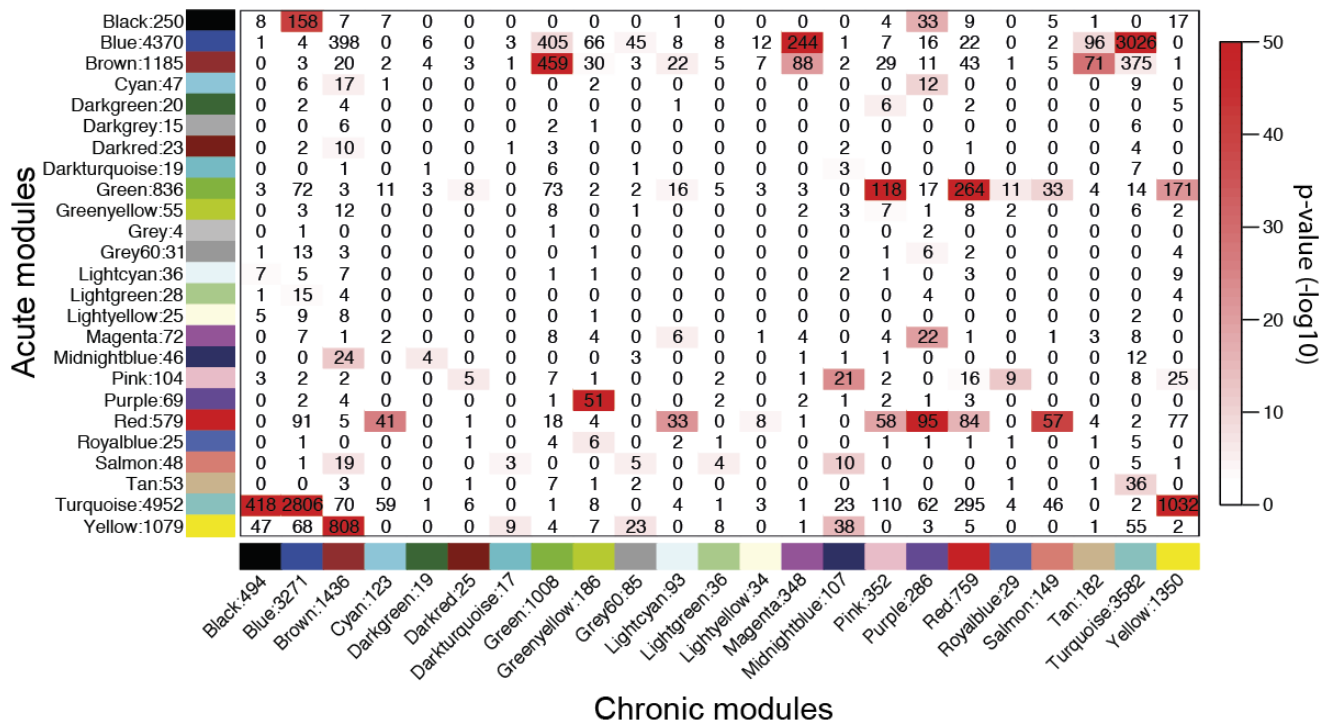

B

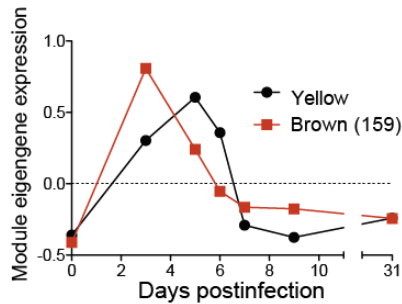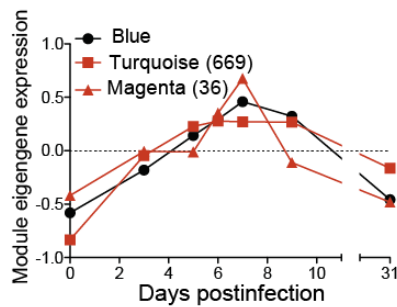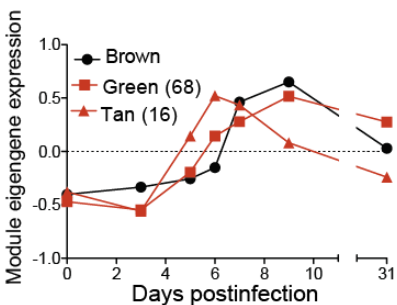

C

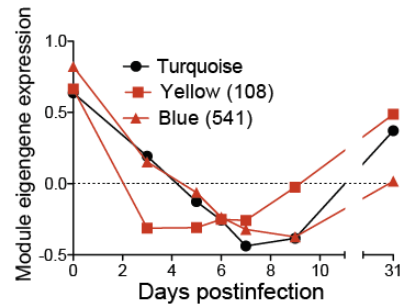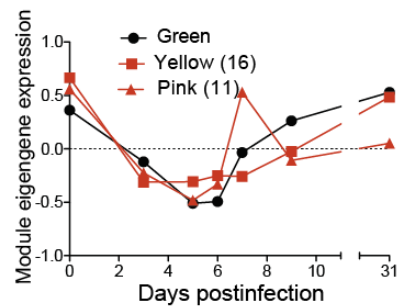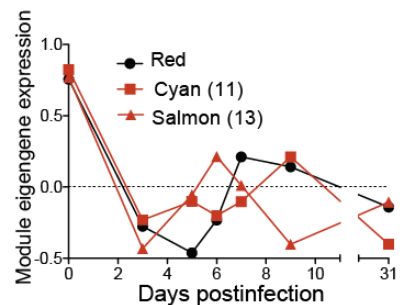

Supplement: Supplemental_Fig_S5.pdf [file Supplemental_Fig_S5.pdf]
