# Supplementary material for: Systems analysis reveals complex biological processes during virus infection fate decisions
Source: HighWire-hosted journal article supplement (doi:10.1101/gr.241372.118), 2019-05-28

**Supplemental Fig. S6. Validation of RNAseq-derived gene expression by qPCR.**

(A) Normalized gene expression (cpm) kinetics obtained from RNAseq analysis of spleens from acute or chronic infected mice. (B) Quantitative PCR of the leukocyte chemotaxis related genes *Itgb2*, *Ccr1*, *C5ar1* and *Itgam* was performed at the indicated days postinfection from spleens of acute or chronic infected mice. Relative gene expression levels were normalized to *Gapdh*. Data are shown as mean  $\pm$  SEM from 5 to 6 mice. Significant differences were determined by an unpaired two-tailed *t*-test. ns, non significant; \*  $p \leq 0.05$ ; \*\*  $p \leq 0.01$ .

A

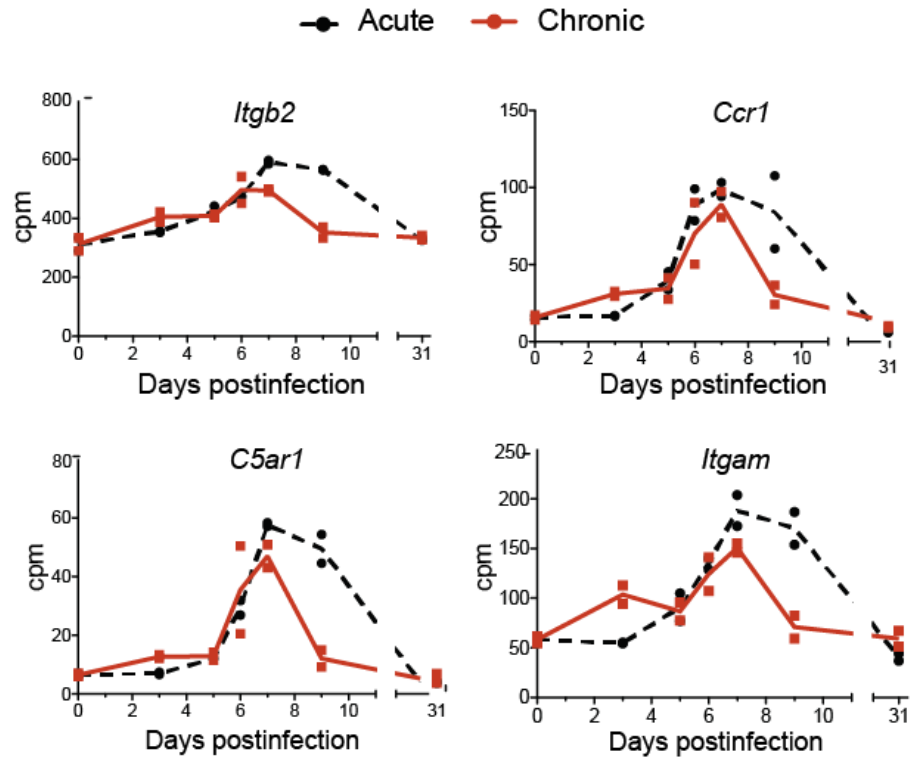

B

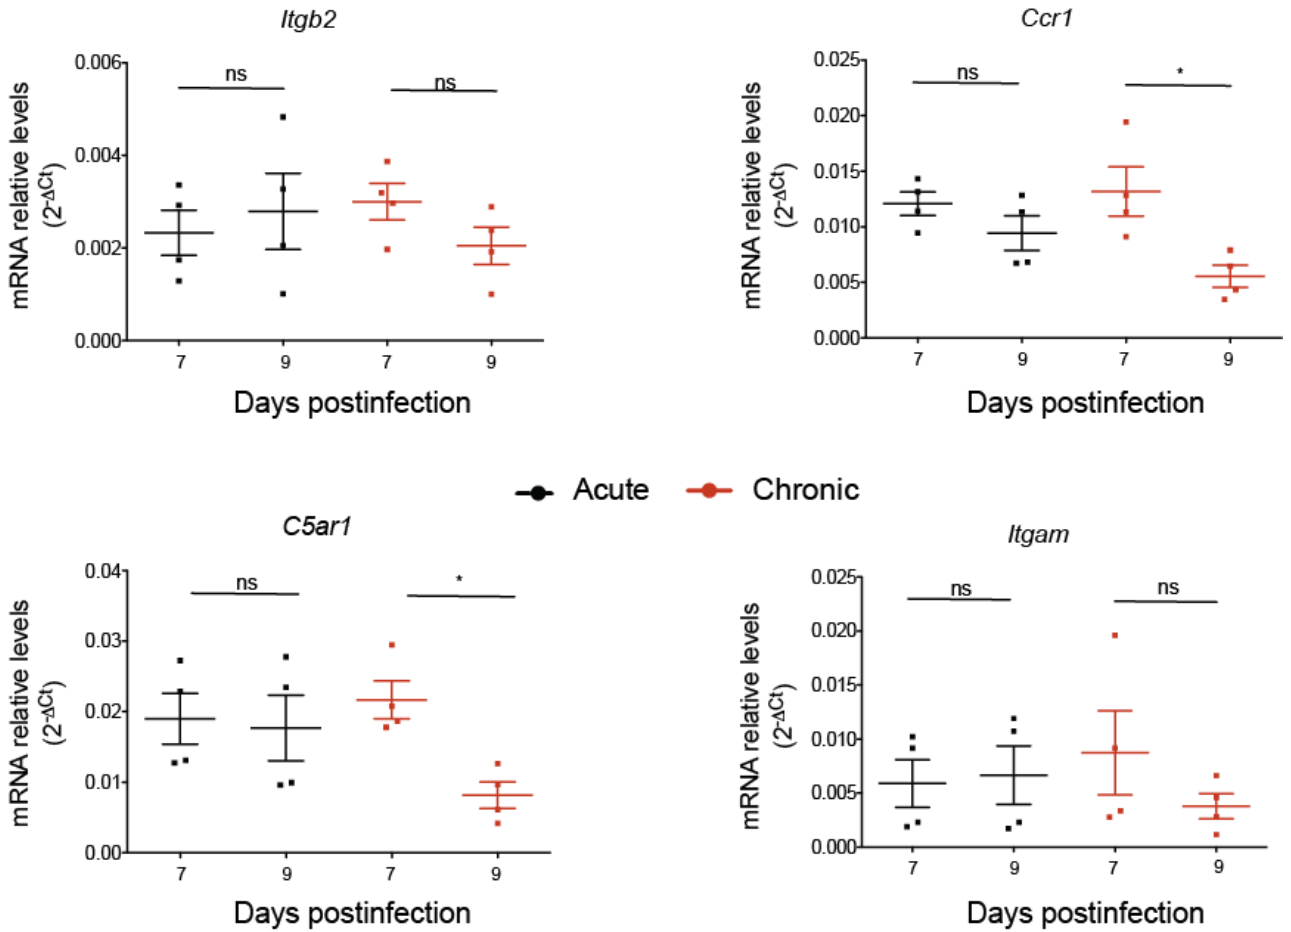

Supplement: Supplemental_Fig_S6.pdf [file Supplemental_Fig_S6.pdf]
