# Supplementary material for: Systems analysis reveals complex biological processes during virus infection fate decisions
Source: HighWire-hosted journal article supplement (doi:10.1101/gr.241372.118), 2019-05-28
Supplement: Supplemental_Table_S1.docx [file Supplemental_Table_S1.docx]

| **Supplemental_Table_S1.** Overlapping hub genes between preserved modules. When the number of overlapping genes>100, only genes representing relevant biological functions obtained from DAVID are shown. | | |
| --- | --- | --- |
| **Acute Yellow** | **# Overlapping genes: 159** | **Chronic Brown** |
|  | | |
| Innate immune response | | |
| | *Bst2, Ddx58, Dhx58, Dhx58, Herc6, Ifih1, Ifit1, Ifit2, Ifit3, Ifitm3, Irf7, Mx1, Mx2, Oas1a, Oas3, Oasl1, Pml, Ripk2, Rnf135, Samhd1, Trim21, Zbp1* | | --- | | | |
| Cellular response to interferon-alpha | | |
| *Ifit1, Ifit2, Ifit3, Myc, I830012O16Rik* | | |
|  | | |
| Cellular response to interferon-beta | | |
| *Ifit1, Ifit3, Ifi205, Trex1* | | |
|  | | |
| Antigen processing and presentation of peptide antigen via MHC class I | | |
| | *H2-K1, H2-M3, H2-Q4, H2-Q6, H2-Q7, H2-T10, H2-T22, H2-T23* | | --- | |  | | | |
|  | | |
| **Acute Turquoise** | **# Overlapping genes: 108** | **Chronic Yellow** |
|  | | |
| Regulation of transcription, DNA-templated | | |
| | *Ehf, Gm12258 Pou2f1 Pura Purb Rfx7 Rnf38 Suv420h1 Txlng Ubp1 Zfp317 Zfp560 Zfp62 Zfp68 Zfp770 Zfp81 Zscan26* | | --- | | | |
|  | | |
| Positive regulation of GTPase activity | | |
| *Ccl21a, Dennd6a, Gm13304, Gm21541, Rapgef6,* | | |
|  | | |
| Lymphocyte chemotaxis | | |
| *Ccl21a, Gm13304, Gm21541* | | |
|  |  |  |
| **Acute Turquoise** | **# Overlapping genes: 541** | **Chronic Blue** |
|  | | |
| Regulation of transcription, DNA-templated | | |
| | *5830428H23Rik, Akap8, Akap8l, Arid3b, Arid4b, Asxl3, AW146154, Brd3, Brwd1, Camta1, Cbx7, Ccar2, Ccnt2, Cdkn2aip, Chd6, Crebzf, Crtc1, Crtc3, Cux1, Dbp, Ddx5, Dmtf1, E4f1, Ebf1, Ebf4, Epc1, Ezh1, Fam120b, Foxj2, Foxj3, Foxp1, Gm15446, Gm9897, Gpbp1l1, Hdac10, Hes5, Hes6, Hif1an, Hmg20a, Il16, Irf3, Jarid2, Kdm3b, Kdm4b, Kdm5b, Krba1, Lrif1, Mapk11, Meis1, Mterf, Mterfd2, Mterfd3, Nfe2l3, Nfrkb, Per3, Phf1, Phf21a, Prdm11, Prdm9, Rarg, Rfx1, Ring1, Sap25, Sirt7, Smad7, Sp6, Srsf5, Tle2, Tspyl2, Wasl, Zbtb49, Zbtb9, Zfp182, Zfp212, Zfp275, Zfp318, Zfp420, Zfp512, Zfp579, Zfp592, Zfp653, Zfp688, Zfp740, Zfp746, Zfp764, Zfp866, Zfp867, Zfp932, Zfp942, Zfp943, Zfp956, Zmym5, Zscan2, Zscan20* | | --- | |  | | | |
| Covalent chromatin modification | | |
| | *Brd3, Cbx7, Chd6, Epc1, Ezh1, Hdac10, Hmg20a, Ing4, Jarid2, Kdm3b, Kdm4b, Kdm5b, Msl1, Ogt, Phf1, Phf21a, Prdm9, Ring1, Sirt7, Tspyl2* | | --- | |  | | | |
| Protein phosphorylation | | |
| | *Clk1, Clk2, Clk4, Csnk1g2, Fgfr3, Ikbkb, Ltk, Map2k7, Map3k1, Map4k1, Map4k2, Mapk11, Mast3, Nek8, Npr2, Obscn, Pan3, Phkg2, Prkcg, Sbk1, Stk11, Tec, Ulk3* | | --- | |  | | | |
|  | | |
| **Acute Blue** | **# Overlapping genes: 669** | **Chronic Turquoise** |
|  | | |
| Cell cycle | | |
| | *Aurka, Aurkb, Bub1, Bub1b, Bub3, Ccnb1, Cdc123, Cdc20, Cdc25a, Cdc34, Cdc45, Cdca2, Cdca5, Cdca8, Cdk1, Cdk4, Cenpw, Cep55, Chaf1a, Chaf1b, Cinp, Ckap2, Cks1b, Cks2, Clspn, Dbf4, E2f7, Ercc6l, Erh, Gm6531, Gmnn, Gsg2, Hells, Kif2c, Lig1, Mad2l1, Mastl, Mcm2, Mcm3, Mcm4, Mcm5, Mcm6, Mcm8, Melk, Mybl2, Nasp, Ncaph, Nek2, Nuf2, Nup37, Pin1, Plk1, Ppm1g, Psrc1, Ran, Rbbp8, Ska3, Spc24, Spdl1, Suv39h1, Tfdp1, Ticrr, Tipin, Tpx2, Ube2s, Uhrf1, Zwilch* | | --- | |  | | | |
|  | | |
| **Acute Blue** | **# Overlapping genes: 36** | **Chronic Magenta** |
|  | | |
| | *Adamts1, Alas1, Aldoart1, Atp1a1, Atp8b4, D630023F18Rik, E230013L22Rik, F7, Fos, Gm12164, Gm13365, Gm13810, Gm13812, Gm15590, Hilpda, Kctd5, Lcp2, Mrgpra2a, Mrgpra2b, Pdcd6ip, Pkm, Plin2, Por, Ptpn12, Rbms1, Rnd1, Rnpep, Slc11a1, Slc16a3, Slc7a8, Soat1, Tagln2* | | --- |   Leukocyte chemotaxis  *C5ar1, Ccr1, Itgam, Itgb2* | | |
|  | | |
| **Acute Green** | **# Overlapping genes: 16** | **Chronic Yellow** |
|  | | |
| | *2410066E13Rik, A830010M20Rik, B230219D22Rik, Cacna1g, Dcaf12, Foxo4, Gm26702, Gm996, Kat6b, Mmp12, Pitpnc1, Slc12a2, Sox4, Unc5b, Zfhx3, Zfp433* | | --- | | | |
|  | | |
|  |  |  |
| **Acute Brown** | **# Overlapping genes: 16** | **Chronic Tan** |
| | *4930519F09Rik, B930095G15Rik, Cd247, Cd3e, Fam71b, Gipc2, Grb7, Kremen2, Prkch, Spn, Themis, Tmem180, Trbv14, Trbv29, Tubgcp2, Zan* | | --- | |  | | | |
|  |  |  |
| **Acute Green** | **# Overlapping genes: 11** | **Chronic Pink** |
| | *Abcc3, Acot2, Decr2m, Fam168a, Fam211b, Fndc4, Mgll, Snrk, Tie1, Tmem19, Trpv4* | | --- | |  | | | |
|  |  |  |
| **Acute Red** | **# Overlapping genes: 13** | **Chronic Salmon** |
|  | | |
| | *2610020H08Rik, Abca2, Cep250, Dip2a, Galnt6, Kif21b, Lsm11, Tmppe, Tnik, Usp48, Xlr4b, Xlr4c, Yeats2* | | --- | |  | | | |
