# Supplementary material for: Systems analysis reveals complex biological processes during virus infection fate decisions
Source: HighWire-hosted journal article supplement (doi:10.1101/gr.241372.118), 2019-05-28
Supplement: Supplemental_Table_S2.docx [file Supplemental_Table_S2.docx]

| **Supplemental_Table_S2.** Chronic-specific module gene list. Related to Figure 3. (*genes regulated by KLF4). | | | | | | | | | | |
| --- | --- | --- | --- | --- | --- | --- | --- | --- | --- | --- |
| **Acute_Magenta** | |  | **Acute_Magenta (cont)** | |  | **Acute_Grey60** | |  | **Chronic_Lightgreen** | |
| **Gene** | **KIM** |  | **Gene** | **KIM** |  | **Gene** | **KIM** |  | **Gene** | **KIM** |
| *Adgb* | 1.000 |  | *Pkd1l3* | 0.412 |  | *Nufip2* | 1.000 |  | *Gm11747* | 1 |
| *Serpina3b* | 0.978 |  | *1700034H15Rik* | 0.403 |  | *Lilra6* | 0.930 |  | *Dtwd1* | 0.982 |
| *Car12* | 0.947 |  | *Wdr19* | 0.388 |  | *Slc39a2* | 0.870 |  | *C1qtnf1* | 0.857 |
| *Stk35* | 0.933 |  | *Grtp1* | 0.358 |  | *Camsap1* | 0.859 |  | *Fam83g* | 0.819 |
| *Myo19* | 0.924 |  | *Cebpg* | 0.355 |  | *Traf4* | 0.784 |  | *Tmem9* | 0.810 |
| *Fdxr* | 0.911 |  | *Kcnf1* | 0.337 |  | *Hgs* | 0.734 |  | *Nudt9* | 0.805 |
| *Slc19a1* | 0.894 |  | *3110043O21Rik* | 0.326 |  | *Nt5dc3* | 0.726 |  | *Serp1* | 0.784 |
| *Lonp1* | 0.869 |  | *Tra2a* | 0.310 |  | *Cdk12* | 0.680 |  | *Capn5** | 0.740 |
| *Dusp1* | 0.847 |  | *Papd5* | 0.289 |  | *Trak1* | 0.666 |  | *Unc50* | 0.720 |
| *Ccrn4l* | 0.821 |  | *Mafg* | 0.272 |  | *Usp40* | 0.659 |  | *Fem1a* | 0.688 |
| *A930007I19Rik* | 0.813 |  | *Sh3bp1* | 0.271 |  | *Hspa1l* | 0.610 |  | *Oaf* | 0.653 |
| *Thbs1* | 0.808 |  | *Scamp3* | 0.241 |  | *Sfmbt2* | 0.587 |  | *Fstl1* | 0.639 |
| *Bcl2l1* | 0.802 |  | *Epha2* | 0.223 |  | *Ier2* | 0.558 |  | *Krt14** | 0.637 |
| *Bend4* | 0.801 |  | *Plekhm1* | 0.220 |  | *Lin37* | 0.549 |  | *Mrgprf** | 0.613 |
| *Doc2a* | 0.795 |  | *Lhfpl2* | 0.126 |  | *Cass4* | 0.522 |  | *B3gnt9* | 0.604 |
| *Pfas* | 0.778 |  | *Lad1* | 0.077 |  | *Slc29a2* | 0.521 |  | *Psmf1* | 0.602 |
| *Gm11508* | 0.758 |  |  |  |  | *Slc5a3* | 0.501 |  | *Kdelr3* | 0.580 |
| *Jmjd6* | 0.756 |  | **Acute_Darkturquoise** | |  | *Arrdc4* | 0.501 |  | *Selk* | 0.563 |
| *Plk2* | 0.722 |  | **Gene** | **KIM** |  | *Phf8* | 0.471 |  | *Msln** | 0.556 |
| *Rassf1* | 0.710 |  | *Fut4* | 1.000 |  | *Pim3* | 0.442 |  | *Asf1a* | 0.555 |
| *Gm13199* | 0.705 |  | *Rp2h* | 0.963 |  | *Gm15228* | 0.434 |  | *Pla2g4c* | 0.507 |
| *Rbm14* | 0.696 |  | *Itm2c* | 0.923 |  | *Cpeb4* | 0.430 |  | *Ahrr* | 0.504 |
| *Ampd2* | 0.680 |  | *Vcam1* | 0.893 |  | *Urb1* | 0.398 |  | *Col18a1** | 0.493 |
| *Mrps10* | 0.671 |  | *Gm26924* | 0.870 |  | *Irak3* | 0.398 |  | *Gm16174* | 0.485 |
| *Htr1b* | 0.668 |  | *Gm12913* | 0.865 |  | *Usp3* | 0.387 |  | *Upk1b* | 0.439 |
| *Mettl13* | 0.656 |  | *Nxt2* | 0.842 |  | *Tlr6* | 0.384 |  | *Atp9a* | 0.435 |
| *Oxnad1* | 0.653 |  | *Gm15564* | 0.695 |  | *Zfp655* | 0.366 |  | *Gm12475* | 0.396 |
| *Mogs* | 0.637 |  | *Prcp* | 0.668 |  | *Crlf2* | 0.338 |  | *Lax1* | 0.355 |
| *Gm16229* | 0.617 |  | *Ccl5* | 0.654 |  | *Smox* | 0.329 |  | *Zfp449* | 0.340 |
| *Lrdd* | 0.606 |  | *Rit1* | 0.649 |  | *Plekhm2* | 0.228 |  | *Mgat1** | 0.275 |
| *Smpd4* | 0.602 |  | *Tpgs1* | 0.626 |  | *Gm16175* | 0.112 |  | *Cd248** | 0.261 |
| *Tcirg1* | 0.600 |  | *B3galnt1* | 0.588 |  |  |  |  | *Prune2* | 0.201 |
| *1700030J22Rik* | 0.599 |  | *Igkv1-122* | 0.481 |  | **Acute_Darkgreen** | |  | *Mocs1* | 0.193 |
| *Neu1* | 0.598 |  | *Rab18* | 0.471 |  | **Gene** | **KIM** |  | *Plbd2* | 0.193 |
| *Cstf2* | 0.598 |  | *Pld3* | 0.454 |  | *Mfap3* | 1 |  | *Tusc1* | 0.143 |
| *Furin* | 0.590 |  | *Pparg* | 0.357 |  | *4930524O07Rik* | 0.996 |  | *Dnajb1** | 0.101 |
| *Slc7a6* | 0.585 |  | *Gm8902* | 0.330 |  | *Gm16001* | 0.976 |  |  |  |
| *Selp* | 0.585 |  | *Sept10* | 0.244 |  | *Arsg* | 0.911 |  | **Chronic_Darkturquoise** | |
| *Gm12201* | 0.571 |  |  |  |  | *Miat* | 0.875 |  | **Gene** | **KIM** |
| *Mrpl37* | 0.564 |  | **Acute_Darkgrey** | |  | *Gm24187* | 0.875 |  | *Gpr176* | 1 |
| *Pusl1* | 0.561 |  | **Gene** | **KIM** |  | *Gm23935* | 0.873 |  | *Xcl1* | 0.966 |
| *2410004B18Rik* | 0.553 |  | *Gm9200* | 1.000 |  | *Gm24245* | 0.873 |  | *Metazoa_SRP* | 0.960 |
| *Nab2* | 0.527 |  | *2010204K13Rik* | 0.998 |  | *Gm24270* | 0.867 |  | *Metazoa_SRP* | 0.956 |
| *Armc6* | 0.508 |  | *Rplp1-ps1* | 0.989 |  | *Hoxa5* | 0.805 |  | *Kirrel* | 0.932 |
| *Kbtbd8* | 0.494 |  | *Gm26377* | 0.944 |  | *Zzef1* | 0.773 |  | *BC048507* | 0.875 |
| *Ddx11* | 0.491 |  | *Psma8* | 0.883 |  | *Pld2* | 0.760 |  | *Gm24105* | 0.802 |
| *Gm13904* | 0.483 |  | *Habp2* | 0.834 |  | *Plek2* | 0.591 |  | *Rpph1* | 0.780 |
| *Exoc1* | 0.479 |  | *Uqcrh* | 0.820 |  | *Etohi1* | 0.533 |  | *Rai14* | 0.643 |
| *Csf2ra* | 0.479 |  | *Gm6206* | 0.792 |  | *Hoxa3* | 0.498 |  | *Gm22179* | 0.618 |
| *Zfp948* | 0.463 |  | *1810043H04Rik* | 0.689 |  | *Clec4b2* | 0.486 |  | *Taf5l* | 0.606 |
| *Gm16194* | 0.462 |  | *Rpp14* | 0.627 |  | *Gm13031* | 0.481 |  | *Enah* | 0.395 |
| *Tbrg4* | 0.452 |  | *Siglece* | 0.569 |  | *Hoga1* | 0.267 |  | *Dnase1l3* | 0.19 |
| *Phlda1* | 0.449 |  | *Fis1* | 0.522 |  | *Zfp518b* | 0.263 |  | *1700007L15Rik* | 0.158 |
| *Tsfm* | 0.443 |  | *Gm11307* | 0.491 |  | *Trio* | 0.177 |  | *Rpl5-ps1* | 0.131 |
| *Rab44* | 0.427 |  | *Emc6* | 0.353 |  |  |  |  | *Eif3s6-ps1* | 0.130 |
| *Adam12* | 0.424 |  | *Lyrm4* | 0.124 |  |  |  |  | *Trbv12-2* | 0.079 |
| **Chronic_Darkred** | |  | **Chronic_Darkgreen** | |  |  |  |  |  |  |
| **Gene** | **KIM** |  | **Gene** | **KIM** |  |  |  |  |  |  |
| *Plagl1* | 1 |  | *Esr1* | 1 |  |  |  |  |  |  |
| *Slc9b2* | 0.942 |  | *Gstm4* | 0.999 |  |  |  |  |  |  |
| *Slamf6* | 0.905 |  | *Fam188b* | 0.949 |  |  |  |  |  |  |
| *Cx3cl1* | 0.897 |  | *Lrrn1* | 0.922 |  |  |  |  |  |  |
| *Lrba* | 0.856 |  | *Rit1* | 0.807 |  |  |  |  |  |  |
| *Idi1* | 0.831 |  | *Galnt18* | 0.657 |  |  |  |  |  |  |
| *Slain1* | 0.699 |  | *AB124611* | 0.635 |  |  |  |  |  |  |
| *Sqle* | 0.640 |  | *Dcxr* | 0.622 |  |  |  |  |  |  |
| *Tnfsf11* | 0.623 |  | *Pafah1b1-ps1* | 0.621 |  |  |  |  |  |  |
| *Gm13502* | 0.607 |  | *Mgst1* | 0.545 |  |  |  |  |  |  |
| *Paip2b* | 0.600 |  | *Tmem50a* | 0.535 |  |  |  |  |  |  |
| *Ap1ar* | 0.578 |  | *Bin3* | 0.493 |  |  |  |  |  |  |
| *Drc1* | 0.559 |  | *H2-T3* | 0.442 |  |  |  |  |  |  |
| *Cyp51* | 0.553 |  | *Ppp1r2* | 0.387 |  |  |  |  |  |  |
| *Lss* | 0.525 |  | *Hpcal1* | 0.352 |  |  |  |  |  |  |
| *Trbv12-1* | 0.491 |  | *Pnpla2* | 0.317 |  |  |  |  |  |  |
| *Etv5* | 0.465 |  | *1700009P17Rik* | 0.242 |  |  |  |  |  |  |
| *Ccdc141* | 0.451 |  | *H2afv* | 0.237 |  |  |  |  |  |  |
| *Snap47* | 0.324 |  | *Vkorc1* | 0.083 |  |  |  |  |  |  |
| *Igfbp2* | 0.321 |  | *Esr1* | 1 |  |  |  |  |  |  |
| *Angptl7* | 0.311 |  |  |  |  |  |  |  |  |  |
| *Smco4* | 0.296 |  |  |  |  |  |  |  |  |  |
| *Fam26e* | 0.184 |  |  |  |  |  |  |  |  |  |
| *Fgf7* | 0.124 |  |  |  |  |  |  |  |  |  |
| *Adcy1* | 0.104 |  |  |  |  |  |  |  |  |  |
