# Supplementary material for: Systems analysis reveals complex biological processes during virus infection fate decisions
Source: HighWire-hosted journal article supplement (doi:10.1101/gr.241372.118), 2019-05-28
Supplement: Supplemental_Table_S3.docx [file Supplemental_Table_S3.docx]

| Term | Genes | Count | % | P value |
| --- | --- | --- | --- | --- |
| mmu03050:Proteasome | *Psmd14, Psmc3, Psma2, Psmb10, Psmd12, Psmd11, Psma3, Psmb7, Gm5422, Psmb6, Gm8394, Pomp, Psma4, Psmb4, Psmd3, Psma6, Psmb3, Psme2b, Psme2, Psma7, Psmd4, Psmb8, Psmd2, Psmb5, Psmd7, Psmb2, Psmc4, Ifng, Psma5, Psma1, Psmc6, Psmc5, Psmc2* | 33 | 2,326 | 2,30E-24 |
| mmu00970:Aminoacyl-tRNA biosynthesis | *Eprs, Nars, Rars, Iars, Yars2, Wars, Farsb, Kars, Sars, Tars, Yars, Aars, Lars, Dars, Cars, Mars* | 16 | 1,200 | 3,81E-08 |
| mmu03040:Spliceosome | *B020018G12Rik, Phf5a, Wbp11, Prpf38a, Hspa8, Gm15459, Gm10069, Nhp2l1, Dhx38, Snrpd2, Sf3a3, Gm5449, Sf3b4, Sf3a1, Usp39, Snrpa1, Snrnp27, Rbm8a, Eftud2, Gm10146, Gm5580, Prpf31, Pcbp1, Rbm17, U2af1, Isy1, Snrpb, Lsm7* | 28 | 1,800 | 6,60E-06 |
| **mmu04060:Cytokine-cytokine receptor interaction** | ***Csf2****,* ***Ifng****, Cxcl2,* ***Il6****,* ***Cxcl5****,* ***Il11****,* ***Ccl7****,* ***Ccl2****,* ***Il1b****,* ***Ccl12****, Cxcl10,* ***Il2ra****, Il1r2,* ***Il12b****,* ***Osm****, Tnfrsf8, Ccl4, Il15ra, Cxcr2,* ***Il1a****, Csf3r,* ***Csf1****, Il12rb1,* ***Tnfrsf12a****,* ***Kitl*** *Il12rb2, Ccl3, Csf2rb, Tnfrsf1a, Flt1, Ltbr, Tnfrsf9, Tnfrsf1b* | 33 | 2,476 | 1,82E-04 |
| **mmu04621:NOD-like receptor signaling pathway** | ***Cxcl2****,* ***Ccl7****,* ***Ccl12****,* ***Il6****,* ***Il1b****, Mefv,* ***Nod2****, Nod1, Nlrp1a,* ***Tnfaip3****, Hsp90aa1, Nfkbib,* ***Ccl2****,* ***Nlrp3*** | 14 | 1,050 | 1,94E-04 |
| **mmu04630:Jak-STAT signaling pathway** | ***Il2ra****, Il12rb2,* ***Il12b****, Csf2rb,* ***Il11****, Spred1, Stat1,* ***Stam2****, Il15ra, Csf3r,* ***Osm****, Ccnd2, Socs1,* ***Il6****, Pim1,* ***Ifng****,* ***Socs2****,* ***Stat3****, Il12rb1, Stat4,* ***Socs3****,* ***Csf2****,* ***Spry4*** | 23 | 1,725 | 4,86E-04 |
| **mmu00330:Arginine and proline metabolism** | ***Nos2****,* ***Arg2****, Ass1, P4ha1, P4ha2, Odc1, Got1, Lap3, Srm, Amd-ps3, Aldh18a1* | 11 | 0,825 | 2,46E-03 |
| mmu00670:One carbon pool by folate | *Shmt1, Atic, Dhfr, Mthfd2, Gart, Shmt2* | 6 | 0,450 | 3,19E-03 |
| mmu00230:Purine metabolism | *Pnp, Ppat, Pold3, Pde8b, Polr2c, Ak4, Gart, Polr3c, Nudt9, Gmps, Pde8a, Gm13015, Gm15210, Pnp2, Polr1d, Impdh2, Adsl, Atic, Polr2f, Dck, Pde7b, Xdh* | 22 | 1,575 | 4,13E-03 |
| mmu04620:Toll-like receptor signaling pathway | *Jun, Spp1, Ripk1, Ccl4, Myd88, Tbk1, Il1b, Il12b, Tlr2, Stat1, Cxcl10, Ticam1, Il6, Ccl3, Cd80* | 15 | 1,125 | 6,21E-03 |
| mmu03018:RNA degradation | *Patl1, Exosc2, Dis3, Hspa9, Exosc3, Gm10146, Ttc37, Xrn1, Gm12141, Skiv2l2, Exosc4, Lsm7, Hspd1* | 13 | 0,825 | 6,24E-03 |
| mmu04623:Cytosolic DNA-sensing pathway | *Cxcl10, Ripk1, Polr1d, Ccl4, Il6, Il1b, Tbk1, Nfkbib, Polr3c, Tmem173* | 10 | 0,750 | 1,05E-02 |
| mmu04940:Type I diabetes mellitus | *Gm12141, H2-D1, Prf1, Ifng, Il1b, H2-Q1, Il1a, Il12b, Cd80, Hspd1, Gzmb* | 11 | 0,750 | 2,43E-02 |
| mmu05020:Prion diseases | *Notch1, Il6, Il1b, Stip1, Bax, Il1a, Hspa5* | 7 | 0,525 | 2,77E-02 |
| mmu04210:Apoptosis | *Ripk1, Gm10053, Casp7, Tnfrsf1a, Myd88, Il1b, Il1a, Bax, Csf2rb, Cycs, Endod1, Endog, Exog* | 13 | 0,900 | 3,10E-02 |
| mmu05332:Graft-versus-host disease | *H2-D1, Prf1, Il6, Ifng, Il1b, H2-Q1, Il1a, Cd80, Gzmb* | 9 | 0,675 | 3,93E-02 |
| mmu00250:Alanine, aspartate and glutamate metabolism | *Asns, Ppat, Adsl, Gpt2, Ass1, Got1* | 6 | 0,450 | 4,80E-02 |

**Supplemental_Table_S3.** Enriched KEGG pathways (obtained from DAVID) for genes of the acute-blue module with a correlation to the *Il6* gene kinetics higher than 0.8. Terms and genes selected for Figure 4E and F are in bold.
