# Supplementary material for: Systems analysis reveals complex biological processes during virus infection fate decisions
Source: HighWire-hosted journal article supplement (doi:10.1101/gr.241372.118), 2019-05-28
Supplement: Supplemental_Table_S4_.docx [file Supplemental_Table_S4_.docx]

| **Antigen** | **Fluorochrome** | **Company** | **Reference** | **Clone** |
| --- | --- | --- | --- | --- |
| Anti-rat IgG2a | AF647 | abcam | Ab172333 | 2A8F4 |
| CD107a | PE | eBiosciences | 12107181 | 1D4B |
| CD107b | BV421 | BD Biosciences | 564249 | ABL-93 |
| CD11b | APC | BD Biosciences | 553312 | M1/70 |
| CD11c | PerCP-Cy5.5 | BD Biosciences | 560584 | HL3 |
| CD3e | PE Cy7 | BD Biosciences | 561100 | 1452C11 |
| CD4 | PE | BD Biosciences | 553653 | H129.19 |
| CD4 | PE | BD Biosciences | 553048 | RM 4-5 |
| CD44 | FITC | eBiosciences | 11044182 | IM7 |
| CD44 | eFluor450 | eBiosciences | 48044180 | IM7 |
| CD45R | PECF594 | BD Biosciences | 562313 | RA3-6B2 |
| CD8a | PerCP-Cy5.5 | BD Biosciences | 551162 | 53-6.7 |
| CD8a | FITC | BD Biosciences | 553030 | 53-6.7 |
| CD8 | PECy5 | BD Biosciences | 553034 | 536.7 |
| CXCR5 | APC | eBiosciences | 17718582 | SPRCL5 |
| CXCR5 | PE Cy7 | eBiosciences | 25718580 | SPRCL5 |
| IL6 | FITC | eBiosciences | 11706181 | MP520F3 |
| INFɣ | FITC | BD Biosciences | 554411 | XMG1.2 |
| Live/Dead | FVS620 | BD Biosciences | 564996 | - |
| Ly6G | PE | BD Biosciences | 551461 | 1A8 |
| Ly6C | FITC | BD Biosciences | 561085 | AL-21 |
| Live/dead | Vivid | Invitrogen | L34955 | - |
| NK1.1 | PECF594 | BD Biosciences | 562864 | PK136 |
| PD1 | FITC | eBiosciences | 11998581 | J43 |
| Tim3 | APC | Biolegend | 134007 | B8.2C12 |
| TNFA | PE | Invitrogen | 12-7321-41 | MP6-XT22 |
| XCR1 | BV510 | Biolegend | 148218 | ZET |
| XCL1 | - | R&D systems | MAB486 | 80222 |

Supplemental Table S4: List of antibodies.
